# Supplementary material
Source: MDPI journal article supplement (https://www.mdpi.com/2077-0472/12/5/633)
Supplement: s1 [file s1]

**Table S1.** Leaf temperature ( $T_{leaf}$ , °C), net CO<sub>2</sub> assimilation rate ( $A$ ,  $\mu\text{mol m}^{-2}\text{s}^{-1}$ ), evapotranspiration rate ( $ET$ ,  $\text{mL m}^{-2}\text{s}^{-1}$ ), and stomatal conductance ( $g_{sw}$ ,  $\text{mol m}^{-2}\text{s}^{-1}$ ) of regular irrigation and drought treatment plants. Values shown in table are mean $\pm$ standard deviation.

| Physiological parameter | Regular irrigation | Drought treatment      |
|-------------------------|--------------------|------------------------|
| Day 0                   |                    |                        |
| $T_{leaf}^a$            | $30.19 \pm 1.44$   | $30.53 \pm 1.33$       |
| $A^b$                   | $14.49 \pm 5.07$   | $14.81 \pm 4.73$       |
| $ET^a$                  | $0.07 \pm 0.03$    | $0.07 \pm 0.03$        |
| $g_{sw}^a$              | $0.23 \pm 0.09$    | $0.23 \pm 0.11$        |
| Last day                |                    |                        |
| $T_{leaf}^a$            | $30.38 \pm 3.86$   | $31.50 \pm 4.38^{***}$ |
| $A^a$                   | $13.33 \pm 5.58$   | $3.51 \pm 3.16^{***}$  |
| $ET^a$                  | $0.06 \pm 0.04$    | $0.01 \pm 0.01^{***}$  |
| $g_{sw}^a$              | $0.17 \pm 0.11$    | $0.02 \pm 0.03^{***}$  |

<sup>a</sup> Using the Mann-Whitney U test to detect whether there is a significant difference between two treatments. (Data do not follow a normal distribution.)

<sup>b</sup> Using the pooled- $t$  test to detect whether there is a significant difference between two treatments.

\*\*\* denotes significant difference between two treatments ( $p < 0.001$ ).

**Table S2.** The  $g_{sw}$  cutoff and the corresponding number of ordinary and low observations for the three control standards of validation data.

| Control standard | $g_{sw}$ cutoff ( $\text{mol H}_2\text{O m}^{-2} \text{s}^{-1}$ ) | Number of observations |     |
|------------------|-------------------------------------------------------------------|------------------------|-----|
| I                | 0.59                                                              | Normal (0)             | 48  |
|                  |                                                                   | Low (1)                | 476 |
| II               | 0.34                                                              | Normal (0)             | 149 |
|                  |                                                                   | Low (1)                | 375 |
| III              | 0.20                                                              | Normal (0)             | 302 |
|                  |                                                                   | Low (1)                | 222 |

**Table S3.** The net CO<sub>2</sub> assimilation rate of ‘Rosada’ under different PPFD. Values shown in table are mean $\pm$ standard error.

| PPFD incident on the leaf ( $\mu\text{mol m}^{-2}\text{s}^{-1}$ ) | $A$ ( $\mu\text{mol CO}_2 \text{m}^{-2}\text{s}^{-1}$ ) |
|-------------------------------------------------------------------|---------------------------------------------------------|
| 1,200                                                             | $21.45 \pm 0.73$                                        |
| 900                                                               | $21.01 \pm 0.66$                                        |
| 600                                                               | $19.54 \pm 0.51$                                        |
| 300                                                               | $13.43 \pm 0.17$                                        |
| 200                                                               | $9.46 \pm 0.07$                                         |
| 150                                                               | $7.14 \pm 0.11$                                         |
| 100                                                               | $4.47 \pm 0.14$                                         |
| 70                                                                | $2.77 \pm 0.14$                                         |
| 30                                                                | $0.35 \pm 0.09$                                         |
| 0                                                                 | $-1.72 \pm 0.05$                                        |

PPFD: photosynthetic photon flux density;  $A$ : net CO<sub>2</sub> assimilation rate
